# Supplementary material for: Theories, models and frameworks used in capacity building interventions relevant to public health: a systematic review
Source: Springer Nature journal article supplement (doi:10.1186/s12889-017-4919-y), 2017-11-28
Supplement: MOESM3 [file 15262134]

## Additional file 3 Appendix C: Critical Appraisal

The development of this critical appraisal is adapted from Caldwell, Henshaw & Taylor (2011) and Creswell (2014). All 19 articles were assessed. All the 'yes' answers were added together for a final score. Articles that score three or below were classified as 'moderate' and articles that scored four to six were scored as 'strong'

| Questions/References                                                                     | Altuttis            | Ballie                                                      | Bagley                           | Bamberg            | Cohen                            | Hu                                 | Katz | Khenti                                                    | Leeman | Meeker                             | Millery  | Murphy |
|------------------------------------------------------------------------------------------|---------------------|-------------------------------------------------------------|----------------------------------|--------------------|----------------------------------|------------------------------------|------|-----------------------------------------------------------|--------|------------------------------------|----------|--------|
| 1. Is the methodology identified and justified?                                          | yes                 | Yes; Literature Review (LR) conducted/ Only one method used | Yes; Interviews and workshop     | Yes; LR interviews | Yes; LR Interviews (I)           | n/a; No methods section commentary | yes  | yes                                                       | yes    | yes                                | yes      | yes    |
| 2. Was a theoretical lens or perspective used to guide the study?                        | Not clearly defined | Not explicitly stated EM implied                            | Not explicitly stated EM implied | yes                | Not explicitly stated EM implied | yes                                | yes  | yes                                                       | yes    | Somewhat; Bloom's named EM implied | yes      | yes    |
| 3. Is the theoretical framework described?                                               | no                  | no                                                          | no                               | yes                | no                               | yes                                | yes  | Yes; however "relevant theories" was stated but not named | yes    | Yes for Bloom's not for EM         | somewhat | yes    |
| 4. Is the theoretical framework easily linked with the problem (or does it seem forced)? | n/a                 | n/a                                                         | n/a                              | yes                | n/a                              | yes                                | yes  | somewhat                                                  | yes    | somewhat                           | Somewhat | yes    |

| Questions/References                                                       | Altuttis | Ballie | Bagley | Bamberg | Cohen | Hu  | Katz | Khenti   | Leeman | Meeker   | Millery  | Murphy |
|----------------------------------------------------------------------------|----------|--------|--------|---------|-------|-----|------|----------|--------|----------|----------|--------|
| 5. If a conceptual framework is used, are the concepts adequately defined? | n/a      | n/a    | n/a    | yes     | n/a   | yes | yes  | somewhat | yes    | somewhat | somewhat | yes    |
| 6. Are the relationships among the concepts clearly identified?            | n/a      | n/a    | n/a    | yes     | n/a   | yes | yes  | somewhat | yes    | Somewhat | somewhat | yes    |
| Total number of 'yes'                                                      | 1        | 1      | 1      | 6       | 1     | 5   | 6    | 3        | 6      | 2        | 2        | 6      |

| Questions/References                                              | Norman                                                      | Olley                                                                   | Preskill and Boyle                                                                       | Risley                                                                                           | Robinson                                                    | Rutten          | Stark |
|-------------------------------------------------------------------|-------------------------------------------------------------|-------------------------------------------------------------------------|------------------------------------------------------------------------------------------|--------------------------------------------------------------------------------------------------|-------------------------------------------------------------|-----------------|-------|
| 1. Is the methodology identified and justified?                   | Somewhat describes the process used but not in great detail | Somewhat; used a survey method but the actual questions were not listed | No methods section; overview of the model; did say the model was developed on literature | Yes; even though there is no methods section; Case study; no methods section                     | Yes; case study design; describes how the cases were chosen | Yes; case study | yes   |
| 2. Was a theoretical lens or perspective used to guide the study? | yes                                                         | yes                                                                     | Somewhat EM implied; Blooms and Diffusion of Innovation named but no references provided | Somewhat; no reference for Adult learning theories but a reference used for Appreciation Inquiry | yes                                                         | yes             | yes   |
| 3. Is the theoretical framework                                   | Somewhat; named but not referenced                          | yes there was a lot used                                                | somewhat                                                                                 | No                                                                                               | yes                                                         | yes             | yes   |

| Questions/References                                                                     | Norman   | Olley                             | Preskill and Boyle | Risley | Robinson | Rutten | Stark |
|------------------------------------------------------------------------------------------|----------|-----------------------------------|--------------------|--------|----------|--------|-------|
| described?                                                                               |          | References were provided for all. |                    |        |          |        |       |
| 4. Is the theoretical framework easily linked with the problem (or does it seem forced)? | Somewhat | yes                               | somewhat           | n/a    | yes      | yes    | yes   |
| 5. If a conceptual framework is used, are the concepts adequately defined?               | Somewhat | somewhat                          | somewhat           | n/a    | yes      | yes    | yes   |
| 6. Are the relationships among the concepts clearly identified?                          | Somewhat | somewhat                          | Somewhat           | n/a    | yes      | yes    | yes   |
| <b>Total number of 'yes'</b>                                                             | 1        | 3                                 | 0                  | 1      | 6        | 6      | 6     |
