# Supplementary material for: Theories, models and frameworks used in capacity building interventions relevant to public health: a systematic review
Source: BMC Public Health. 2017 Nov 28;17:914. doi: 10.1186/s12889-017-4919-y (PMC5706342; doi:10.1186/s12889-017-4919-y)
Supplement: Supplementary file 2 — Appendix B: Grey literature search strategy. (PDF 258 kb) [file 12889_2017_4919_MOESM2_ESM.pdf]

## Additional file 2 Appendix B: Grey Literature Search Terms

Google <https://www.google.ca/>

| Search strategy                                                                                                                                                                                                                         | Date searched | # results retrieved | # results reviewed | # results selected |
|-----------------------------------------------------------------------------------------------------------------------------------------------------------------------------------------------------------------------------------------|---------------|---------------------|--------------------|--------------------|
| "public health" OR "health promotion" capacity OR skill OR ability OR workforce build OR increase OR develop OR enhance OR strengthen                                                                                                   | Nov 10,2016   | 154,000,000         | 50                 | 7                  |
| "public health" OR "health promotion" capacity OR skill OR ability OR workforce build OR increase OR develop OR enhance OR strengthen                                                                                                   | Nov 10,2016   | 154,000,000         | 50                 | 1E                 |
| "public health" OR "health promotion" capacity building change-agent OR consultant OR workshop OR webinar                                                                                                                               | Nov 10,2016   | 2,800,000           | 50                 | 2E                 |
| "public health" OR "health promotion" capacity building theory OR framework OR model OR concept OR heuristic OR paradigm OR principle OR stage OR lens                                                                                  | Nov 10,2016   | 3,720,000           | 50                 | 4                  |
| "public health" OR "health promotion" capacity building learning OR teaching OR instruction OR education OR training OR mentor OR preceptor                                                                                             | Nov 10,2016   | 4,140,000           | 50                 | 3                  |
| "public health" OR "health promotion" capacity building human-resources OR employee OR employer OR manpower OR health-personnel OR health practitioner OR health-professional OR health-provider OR staff OR workforce OR health-system | Nov 10,2016   | 39,800,000          | 50                 | 0                  |
| "prevention capacity" OR "health promotion capacity" OR "public health capacity"                                                                                                                                                        | Nov 10,2016   | 126,000             | 50                 | 0                  |
